# Supplementary material for: Enhancing the Differentiation between Intestinal Behçet’s Disease and Crohn’s Disease through Quantitative Computed Tomography Analysis
Source: MDPI journal article supplement (doi:10.3390/bioengineering10101211), 2023-10-17
Supplement: s1 [file s1]

Table S1. Univariable analysis for the variables of interest.

| Item                                  | <i>p</i> Value | OR    | 95% CI       |
|---------------------------------------|----------------|-------|--------------|
| Age                                   | <0.001         | 1.076 | 1.037-1.117  |
| Sex (male)                            | 0.015          | 0.308 | 0.119-0.799  |
| Ulcer distribution (focal)            | <0.001         | 7.529 | 2.601-21.795 |
| Proximal ileum involvement            | 0.007          | 0.062 | 0.008-0.475  |
| Asymmetrical thickening of bowel wall | 0.032          | 0.250 | 0.071-0.885  |
| Intestinal stenosis                   | 0.018          | 0.218 | 0.062-0.772  |
| Area ratio of L4 VAT/ SAT             | 0.056          | 0.287 | 0.080-1.030  |
| CV                                    | 0.058          | 0.060 | 0.003-1.103  |

CV means the coefficient of variation of the area of VAT of L1-L5.

OR, odds ratio; CI, confidence interval; VAT, visceral adipose tissue; SAT, subcutaneous adipose tissue; CV, coefficient of variation.
